# Supplementary material for: Improvement of large copy number variant detection by whole genome nanopore sequencing
Source: PubMed Central journal article supplement — J Adv Res. 2022 Oct 30;50:145–58. doi: 10.1016/j.jare.2022.10.012 (PMC10403694; doi:10.1016/j.jare.2022.10.012), 2022-10-30
Supplement: mmc2.pdf [file mmc2.pdf]

**Supplementary Information for “*Improvement of structural variants detection using whole genome nanopore sequencing and comparative genome hybridization*”**

Javier Cuenca-Guardiola, Belén de la Morena Barrio, Juan Luis García, Alba Sanchis-Juan, Javier Corral de la Calle and Jesualdo Tomás Fernández-Breis

**Supplementary material**

|                             |    |
|-----------------------------|----|
| Supplementary Figures.....  | 2  |
| Supplementary Figure 1..... | 3  |
| Supplementary Figure 2..... | 4  |
| Supplementary Figure 3..... | 5  |
| Supplementary Figure 4..... | 6  |
| Supplementary Tables.....   | 7  |
| Supplementary Table 1.....  | 8  |
| Supplementary Table 2.....  | 9  |
| Supplementary Table 3.....  | 10 |

## Supplementary Figures

Supplementary Figure 1

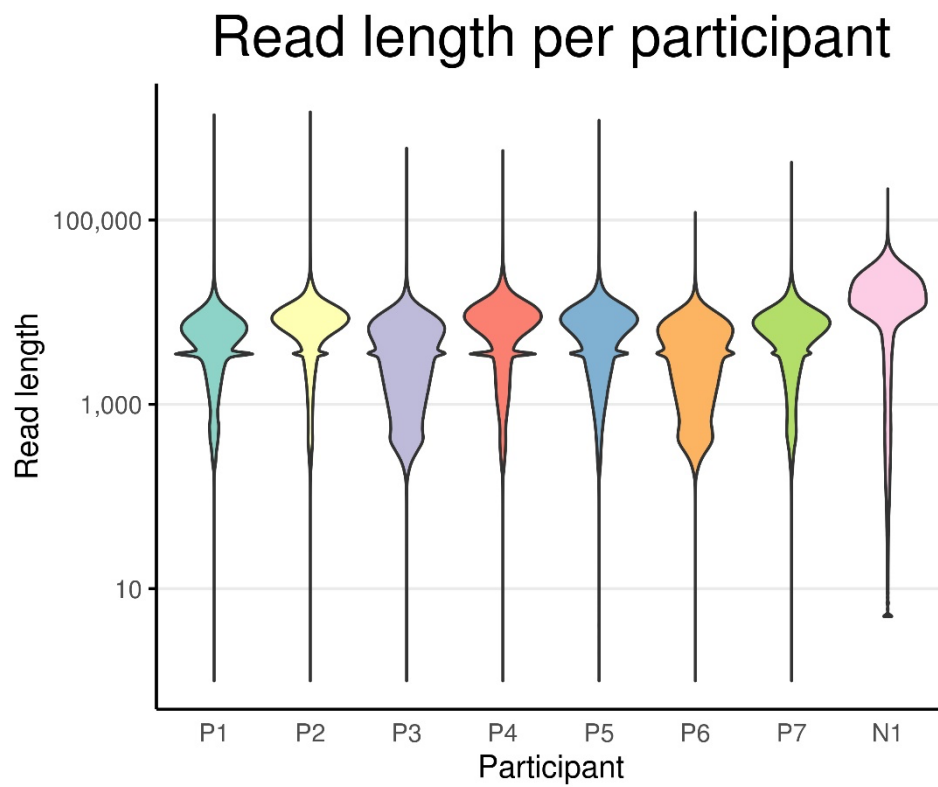

**Fig. S1.** Violin plots of read length distribution per patient. Each patient's shape is a different color. N1 refers to NA19240. The mean length is similar for all cases except for NA19240.

## Supplementary Figure 2

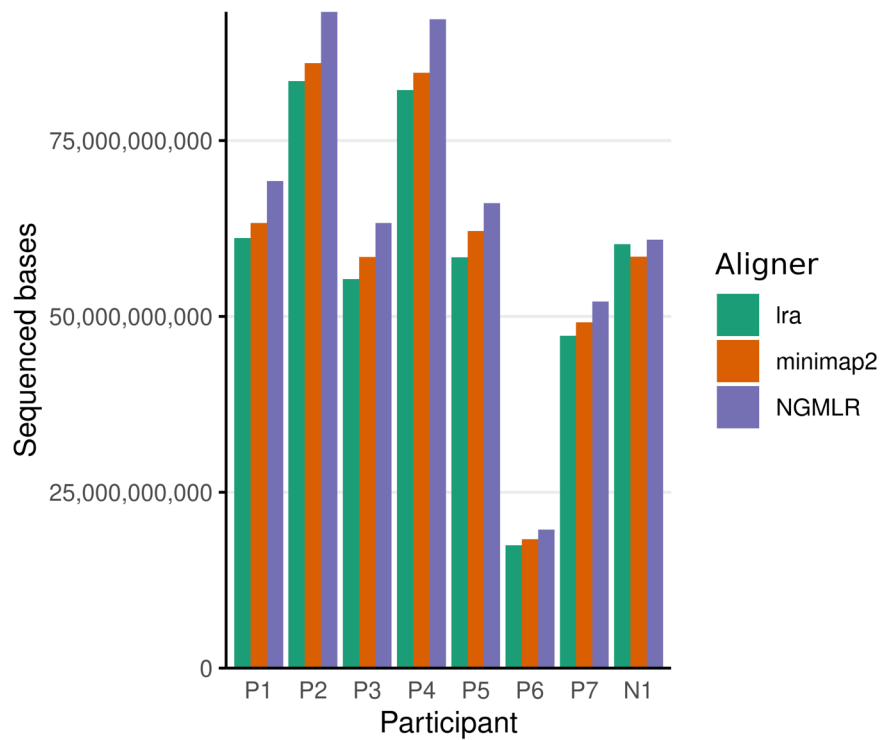

**Fig. S2.** Metrics of nanopore sequencing for each patient included in this study and NA19240 (N1): number of bases sequenced per aligner: dark green for minimap2, orange for NGMLR, purple for Ira. P6's sequencing yielded fewer bases, while the data used from NA19240's whole genome sequencing was similar to the study cases.

### Supplementary Figure 3

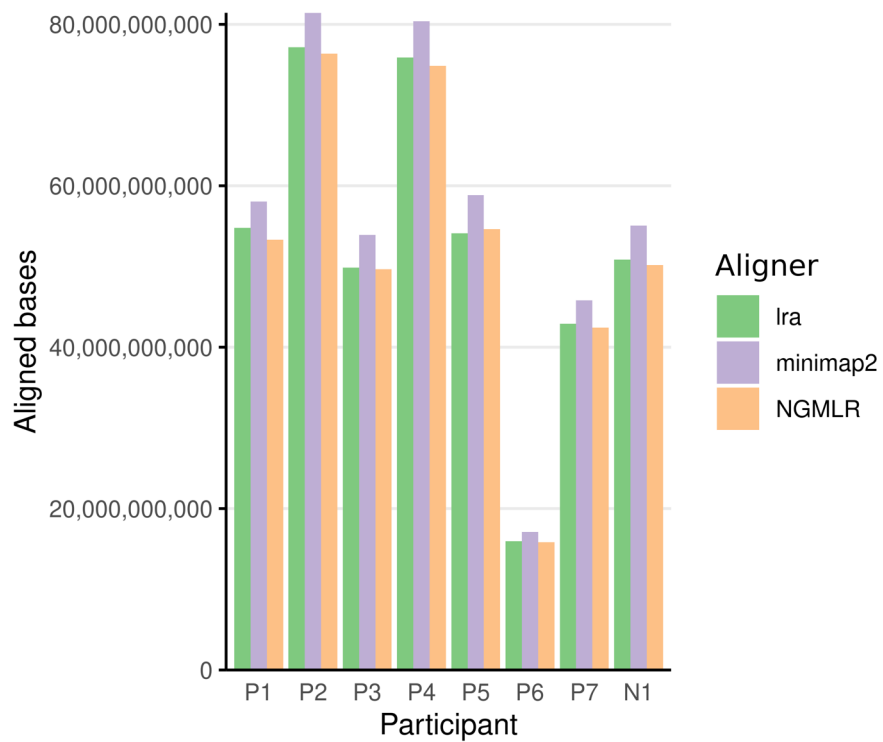

**Fig. S3.** Metrics of nanopore sequencing for each patient included in this study and NA19240 (N1): number of bases aligned: green for minimap2, violet for NGMLR, orange for Ira. As for the number of bases sequenced, P6's sequencing produced fewer, while NA19240 data was similar to our study cases.

## Supplementary Figure 4

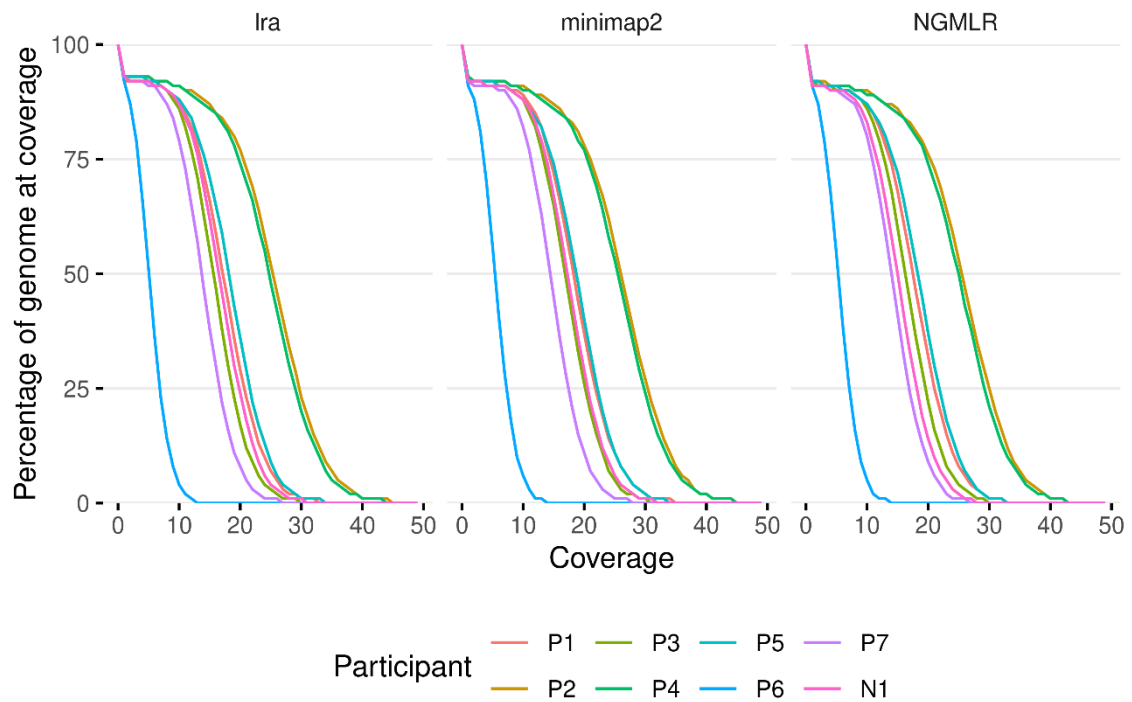

**Fig. S4.** Percentage of the genome covered by nanopore sequencing for each patient according to Ira, minimap2 or NGMLR analysis. Participants are color-coded. N1 refers to NA19240. As expected by the low base count, P6's coverage was lower, not reaching 20x depth in any position. Again, the data from NA19240 was similar to the study cases.

## Supplementary Tables

## Supplementary Table 1

This table is provided as a standalone file. The first row contains the description of the column, for example, “Sniffles RE (minimap2)” contains the RE value (read support) for Sniffles after having used minimap2.

The table contains aCGH coordinates and CNV type for the variants in the study, and for each caller, coordinates, SV type, read support (RE), and for SVIM, the QUAL value that SVIM computes. Additionally, it includes the disCoverage results for these SVs. The p-value thresholds are the same than in the main text: “\*\*\*\*”: p-value  $\leq 1e-13482$ , “\*\*\*”:  $1e-3117$ . For this table, an arbitrary value was chosen for “\*”: p-value  $\leq 1e-1000$ , it is worth mentioning that variants have only been considered supported when below the first threshold. After this, information is presented for the hg19 pipeline. Coordinates prefixed by an exclamation mark (!) indicate that the SV was not considered found, either for a difference in size larger than 30%, or a read support below the threshold, but are included for completion’s sake.



Supplementary Table 2

| Tool        | Type of software       | Input                      | Output                        | Type of SV it can process | Genotypes SVs?                  |
|-------------|------------------------|----------------------------|-------------------------------|---------------------------|---------------------------------|
| lra         | Aligner                | Reads                      | Alignment                     | -                         | -                               |
| minimap2    | Aligner                | Reads                      | Alignment                     | -                         | -                               |
| NGMLR       | Aligner                | Reads                      | Alignment                     | -                         | -                               |
| cuteSV      | Variant caller         | Alignment                  | Variant calls                 | DEL, DUP, INV, INS, TRA   | Yes                             |
| NanoVar     | Variant caller         | Alignment                  | Variant calls                 | DEL, DUP, INV, INS, TRA   | Yes                             |
| Sniffles    | Variant caller         | Alignment                  | Variant calls                 | DEL, DUP, INV, INS, TRA   | Yes                             |
| SVIM        | Variant caller         | Alignment                  | Variant calls                 | DEL, DUP, INV, INS, TRA   | Yes*                            |
| SURVIVOR    | Variant combiner       | Variant calls              | Variant calls                 | DEL, DUP, INV, INS, TRA   | No<br>(accepts genotyped input) |
| mosdepth    | Coverage analysis tool | Alignments                 | Coverage                      | -                         | -                               |
| disCoverage | Other                  | Variant calls, coordinates | Coverage support for variants | DEL, DUP                  | No                              |

**Table S2** This table summarizes the aligners and variant callers employed in this work, alongside other well-established tools. The software disCoverage has been added to clarify its function. Aligners generate mappings of reads against a reference genome. Variant callers take these mappings, detect patterns of variation, and generate calls for SVs. Additionally, callers may genotype variants. Some of them, such as SVIM, can run minimap2 or other aligners, but we have not considered them aligners. This table is a summary, and these tools have many uses and applications, only those relevant for this work are listed. \*: Genotyping is described as stable.

Supplementary Table 3

| Aligner  | SV type | Total            | <1 kb            | 1-10 kb        | 10-50 kb       | >50 kb      |
|----------|---------|------------------|------------------|----------------|----------------|-------------|
| lra      | INS     | 6 763<br>(36.2%) | 6 187<br>(40.6%) | 575<br>(18.2%) | 1<br>(0.59%)   | 0<br>(0.0%) |
|          | DEL     | 6 942<br>(37.9%) | 6 177<br>(41.2%) | 738<br>(25.0%) | 27<br>(9.78%)  | 0<br>(0.0%) |
|          | DUP     | 41<br>(3.7%)     | 41<br>(6.8%)     | 0<br>(0.0%)    | 0<br>(0.00%)   | 0<br>(0.0%) |
| minimap2 | INS     | 7 009<br>(37.6%) | 6 355<br>(41.7%) | 652<br>(20.6%) | 2<br>(1.18%)   | 0<br>(0.0%) |
|          | DEL     | 7 817<br>(42.7%) | 6 989<br>(46.7%) | 795<br>(26.9%) | 32<br>(11.59%) | 1<br>(1.1%) |
|          | DUP     | 153<br>(13.8%)   | 130<br>(21.5%)   | 19<br>(4.9%)   | 4<br>(4.49%)   | 0<br>(0.0%) |
| NGMLR    | INS     | 6 503<br>(34.8%) | 5 902<br>(38.7%) | 600<br>(19.0%) | 1<br>(0.59%)   | 0<br>(0.0%) |
|          | DEL     | 7 331<br>(40.1%) | 6 532<br>(43.6%) | 770<br>(26.1%) | 29<br>(10.51%) | 0<br>(0.0%) |
|          | DUP     | 182<br>(16.4%)   | 163<br>(26.9%)   | 15<br>(3.9%)   | 4<br>(4.49%)   | 0<br>(0.0%) |

**Table S3.** Performance of variant calling after each aligner, split by SV size, for NA19240 data. As SV size increases, recall diminishes, although this is particularly steep over 50 kb. The truth set included 231 inversions with length lower than 1000 bp, none of them were found, and 75 SVs labeled as CNV, which did not allow SURVIVOR to match them against the calls generated by our pipeline. When comparing sets ignoring SV types, they were not found, either. INS: insertions, DUP: duplications, DEL: deletions.
